# Supplementary material for: Two Benthic Diatoms, Nanofrustulum shiloi and Striatella unipunctata, Encapsulated in Alginate Beads, Influence the Reproductive Efficiency of Paracentrotus lividus by Modulating the Gene Expression
Source: MDPI journal article supplement (doi:10.3390/md19040230), 2021-04-17
Supplement: s1 [file s1]

**Two benthic diatoms, *Nanofrustulum shiloi* and *Striatella unipunctata*,  
encapsulated in alginate beads, influence the reproductive efficiency of  
*Paracentrotus lividus***

Francesca Glaviano<sup>1,#</sup>, Nadia Ruocco<sup>1,#</sup>, Emanuele Somma<sup>1,#</sup>, Giuseppe De Rosa<sup>2</sup>, Virginia Campani<sup>2</sup>, Pasquale Ametrano<sup>1</sup>, Maria Costantini<sup>1,\*</sup>, Valerio Zupo<sup>1,\*</sup>

<sup>1</sup>*Department of Marine Biotechnology, Stazione Zoologica Anton Dohrn, Villa Comunale, 80121 Napoli, Italy*

<sup>3</sup>*Department of Pharmacy, University of Naples Federico II, Naples, Italy*

#These authors contributed equally to this work

\*Authors to whom correspondence should be addressed: maria.costantini@szn.it, vzupo@szn.it, Tel.: +39-081-583-3315; Fax: +39-081-764-1355

**Figure S1.** a. Images of *S. unipunctata* under the optical microscope (a) and SEM (b-c). The diatom shows a big chloroplast in the middle of the cell (a), a frustule with rectangular shape and truncated corners (b), a mucilaginous stalk (b), and characteristic ornamental striae on the surface of each valve (c). Scale bars= 15  $\mu\text{m}$  (a), 10  $\mu\text{m}$  (b), 1  $\mu\text{m}$  (c).

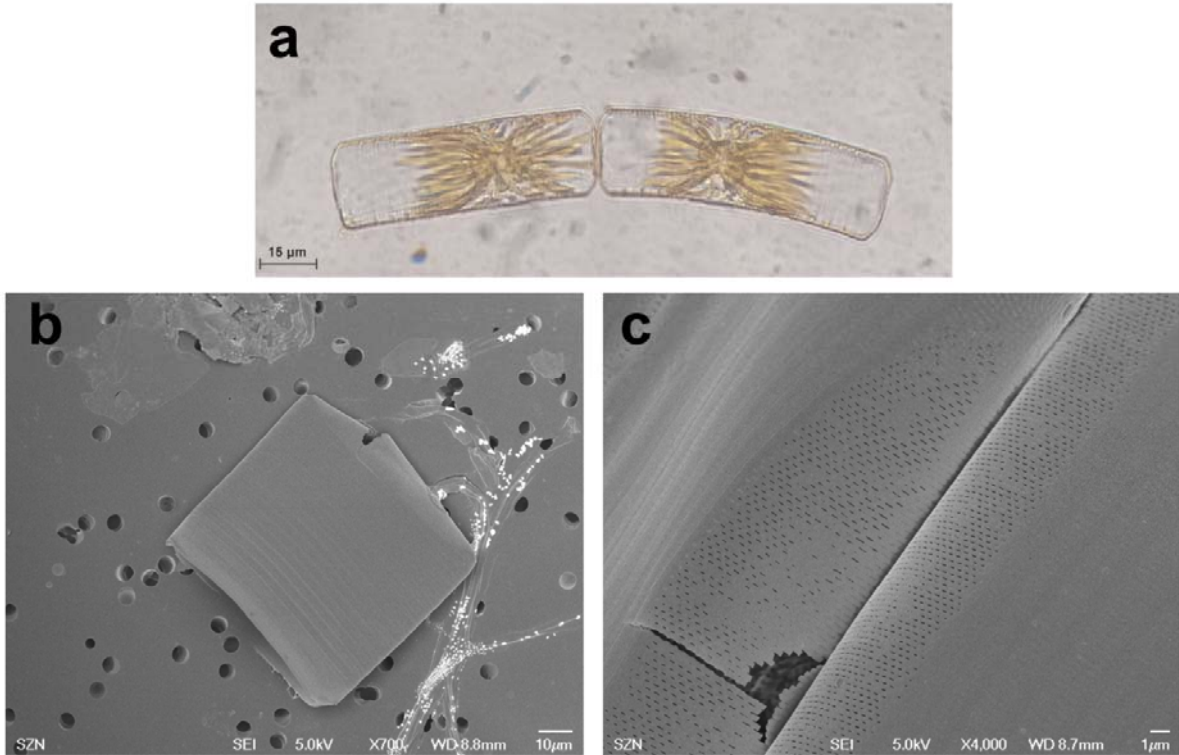

**Figure S2.** Alignments of *S. unipunctata* to the four annotated 18S rRNA sequences found in BLASTn search with accession numbers JX419383.1 (a), AB430609.1 (b), AF525666.1 (c) and HQ912643.1 (d). Froward and reverse primers were highlighted by a green and sky blue rectangle, respectively.

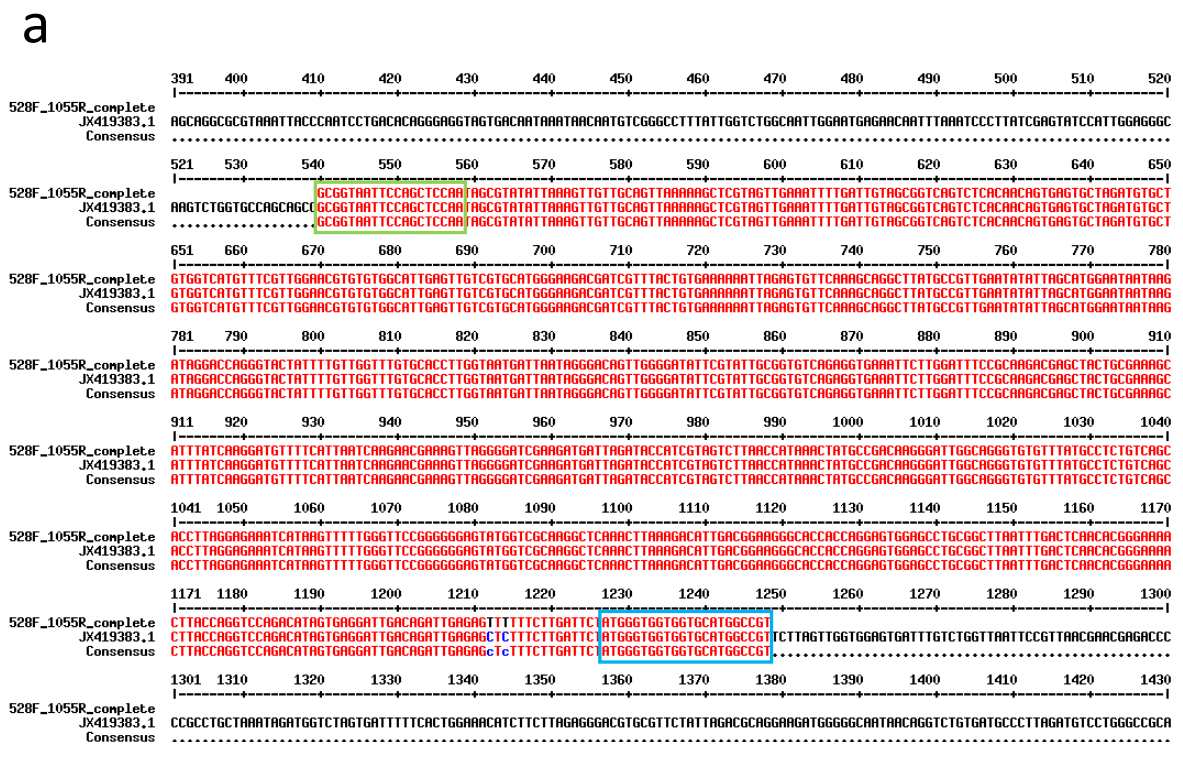

b

528F\_1055R\_complete  
AB430609.1  
Consensus

391 400 410 420 430 440 450 460 470 480 490 500 510 520  
CCAGGGAGGCGAGCGGCGGTAARATACCCAACTCGACACAGGGAGGTAGTGACAAATAATACAAATGTCGGGCCCTTATTGGCTGGCAATTGGAAATGAGAACAAATTAATCCCTATTCGAGTATC

528F\_1055R\_complete  
AB430609.1  
Consensus

521 530 540 550 560 570 580 590 600 610 620 630 640 650  
CATTGGAGGGCAGCTGGTCCAGCAGCGCGGTAATCCAGCTCCAAAGCGTATATTAAGTGTGTCAGTTAAAAGCTCGTAGTTGAARATTTGATTTAGCGGTCAGCTCCACACAGTGGTG  
CGGTAATCCAGCTCCAAAGCGTATATTAAGTGTGTCAGTTAAAAGCTCGTAGTTGAARATTTGATTTAGCGGTCAGCTCCACACAGTGGTG

528F\_1055R\_complete  
AB430609.1  
Consensus

651 660 670 680 690 700 710 720 730 740 750 760 770 780  
CTAGATGCTGTGGTCATGTTTCGTTGGACAGCTGTGGCATTGAGTTGTCGTCATGGGAGACGATCGTTTACTGTGAAAAATTAGAGTGTTCARAGCAGGCTTATGCCGTTGAATATATAGCAT  
CTAGATGCTGTGGTCATGTTTCGTTGGACAGCTGTGGCATTGAGTTGTCGTCATGGGAGACGATCGTTTACTGTGAAAAATTAGAGTGTTCARAGCAGGCTTATGCCGTTGAATATATAGCAT

528F\_1055R\_complete  
AB430609.1  
Consensus

781 790 800 810 820 830 840 850 860 870 880 890 900 910  
GGAAATAGATAGGACACAGGCTACTATTTGTTGGTTGTGCACCTTGGTAATGATTAAATAGGACAGTGGGGATATTCGATTCGGGTGTCAGAGGTGAARATCTGGATTTCCGACAGACAGCT  
GGAAATAGATAGGACACAGGCTACTATTTGTTGGTTGTGCACCTTGGTAATGATTAAATAGGACAGTGGGGATATTCGATTCGGGTGTCAGAGGTGAARATCTGGATTTCCGACAGACAGCT

528F\_1055R\_complete  
AB430609.1  
Consensus

911 920 930 940 950 960 970 980 990 1000 1010 1020 1030 1040  
ACTGCAAGGCAATTTATCAGGATGTTTCATTATCAGACAGAAAGTTAGGGGATCGAGATGATTAGATACCATCGTAGCTTAAACATAAACTATGCCACAGGGATTGGCAGGGTGTGTTATG  
ACTGCAAGGCAATTTATCAGGATGTTTCATTATCAGACAGAAAGTTAGGGGATCGAGATGATTAGATACCATCGTAGCTTAAACATAAACTATGCCACAGGGATTGGCAGGGTGTGTTATG  
ACTGCAAGGCAATTTATCAGGATGTTTCATTATCAGACAGAAAGTTAGGGGATCGAGATGATTAGATACCATCGTAGCTTAAACATAAACTATGCCACAGGGATTGGCAGGGTGTGTTATG

528F\_1055R\_complete  
AB430609.1  
Consensus

1041 1050 1060 1070 1080 1090 1100 1110 1120 1130 1140 1150 1160 1170  
CCTCTGTCAGCACCCTAGGAGAAATCATAGTTTTGGGTCGCGGGGGAGTATGGTCGACAGGCTCAAACTTAAGACATTTAGCGAGGGGACACACAGGAGTGGAGCTCGGGCTTAAATGACTCA  
CCTCTGTCAGCACCCTAGGAGAAATCATAGTTTTGGGTCGCGGGGGAGTATGGTCGACAGGCTCAAACTTAAGACATTTAGCGAGGGGACACACAGGAGTGGAGCTCGGGCTTAAATGACTCA

528F\_1055R\_complete  
AB430609.1  
Consensus

1171 1180 1190 1200 1210 1220 1230 1240 1250 1260 1270 1280 1290 1300  
ACACGGGAARACTTACAGGTCAGACATAGTGGGATGACAGATTGAGAGTTTCTCTGATTCATGGGTTGGTGCATGGCCGTTCTTAGTTGGTGGAGTATTGCTGGTAAATCCGTTAAC  
ACACGGGAARACTTACAGGTCAGACATAGTGGGATGACAGATTGAGAGTCTCTCTGATTCATGGGTTGGTGCATGGCCGTTCTTAGTTGGTGGAGTATTGCTGGTAAATCCGTTAAC  
ACACGGGAARACTTACAGGTCAGACATAGTGGGATGACAGATTGAGAGTCTCTCTGATTCATGGGTTGGTGCATGGCCGTTCTTAGTTGGTGGAGTATTGCTGGTAAATCCGTTAAC

528F\_1055R\_complete  
AB430609.1  
Consensus

1301 1310 1320 1330 1340 1350 1360 1370 1380 1390 1400 1410 1420 1430  
GAACGAGACCCCGCTGCTAATAGATGGTCTAGTGTATTTTCTACTGAAACATCTTCTTAGAGGGACGTCGCTTCTATTAGCGCAGGAGGATGGGGCAATACAGGCTGTGTATGCCCTTAGATGT

C

528F\_1055R\_complete  
AF525666.1  
Consensus

391 400 410 420 430 440 450 460 470 480 490 500 510 520  
GCGTAATATCCCACTCGACACAGGGAGGTAGTGACAAATAATACAAATGTCGGGCCCTTATTGGCTGGCAATTGGAAATGAGAACAAATTAATCCCTATTCGAGTATCCATTGGAGGGCAGCTG

528F\_1055R\_complete  
AF525666.1  
Consensus

521 530 540 550 560 570 580 590 600 610 620 630 640 650  
GTGCCAGCAGCGCGGTAATCCAGCTCCAAAGCGTATATTAAGTGTGTCAGTTAAAAGCTCGTAGTTGAARATTTGATTTAGCGGTCAGCTCCACACAGTGGTG  
CGGTAATCCAGCTCCAAAGCGTATATTAAGTGTGTCAGTTAAAAGCTCGTAGTTGAARATTTGATTTAGCGGTCAGCTCCACACAGTGGTG

528F\_1055R\_complete  
AF525666.1  
Consensus

651 660 670 680 690 700 710 720 730 740 750 760 770 780  
TGTTCGTTGGACAGCTGTGGCATTGAGTTGTCGTCATGGGAGACGATCGTTTACTGTGAAAAATTAGAGTGTTCARAGCAGGCTTATGCCGTTGAATATATAGCATGGAAATAGATAGGAC  
TGTTCGTTGGACAGCTGTGGCATTGAGTTGTCGTCATGGGAGACGATCGTTTACTGTGAAAAATTAGAGTGTTCARAGCAGGCTTATGCCGTTGAATATATAGCATGGAAATAGATAGGAC

528F\_1055R\_complete  
AF525666.1  
Consensus

781 790 800 810 820 830 840 850 860 870 880 890 900 910  
CAGGGTACTATTTGTTGGTTGTGCACCTTGGTAATGATTAAATAGGACAGTGGGGATATTCGATTCGGGTGTCAGAGGTGAARATCTGGATTTCCGACAGACAGCTACTGCGAAGCATTTATC  
CAGGGTACTATTTGTTGGTTGTGCACCTTGGTAATGATTAAATAGGACAGTGGGGATATTCGATTCGGGTGTCAGAGGTGAARATCTGGATTTCCGACAGACAGCTACTGCGAAGCATTTATC

528F\_1055R\_complete  
AF525666.1  
Consensus

911 920 930 940 950 960 970 980 990 1000 1010 1020 1030 1040  
AAGGATGTTTCATTATCAGACAGAAAGTTAGGGGATCGAGATGATTAGATACCATCGTAGCTTAAACATAAACTATGCCACAGGGATTGGCAGGGTGTGTTATGCCCTTGTACACACTTAG  
AAGGATGTTTCATTATCAGACAGAAAGTTAGGGGATCGAGATGATTAGATACCATCGTAGCTTAAACATAAACTATGCCACAGGGATTGGCAGGGTGTGTTATGCCCTTGTACACACTTAG  
AAGGATGTTTCATTATCAGACAGAAAGTTAGGGGATCGAGATGATTAGATACCATCGTAGCTTAAACATAAACTATGCCACAGGGATTGGCAGGGTGTGTTATGCCCTTGTACACACTTAG

528F\_1055R\_complete  
AF525666.1  
Consensus

1041 1050 1060 1070 1080 1090 1100 1110 1120 1130 1140 1150 1160 1170  
GAGAAATCATAGTTTTGGGTCGCGGGGGAGTATGGTCGACAGGCTCAAACTTAAGACATTTAGCGAGGGGACACACAGGAGTGGAGCTCGGGCTTAAATGACTCAACAGGGAAACTTACCA  
GAGAAATCATAGTTTTGGGTCGCGGGGGAGTATGGTCGACAGGCTCAAACTTAAGACATTTAGCGAGGGGACACACAGGAGTGGAGCTCGGGCTTAAATGACTCAACAGGGAAACTTACCA

528F\_1055R\_complete  
AF525666.1  
Consensus

1171 1180 1190 1200 1210 1220 1230 1240 1250 1260 1270 1280 1290 1300  
GGTCCAGACATAGTGGGATGACAGATTGAGAGTTTCTCTGATTCATGGGTTGGTGCATGGCCGTTCTTAGTTGGTGGAGTATTGCTGGTAAATCCGTTAACGACAGGACAGCCCGCTGCTG  
GGTCCAGACATAGTGGGATGACAGATTGAGAGTCTCTCTGATTCATGGGTTGGTGCATGGCCGTTCTTAGTTGGTGGAGTATTGCTGGTAAATCCGTTAACGACAGGACAGCCCGCTGCTG

528F\_1055R\_complete  
AF525666.1  
Consensus

1301 1310 1320 1330 1340 1350 1360 1370 1380 1390 1400 1410 1420 1430  
TAATAGATGGTCTAGTGTATTTCTACTGAAACATCTTCTTAGAGGGACGTCGCTTCTATTAGCGCAGGAGGATGGGGCAATACAGGCTGTGTATGCCCTTAGATGTCTGGCCGACAGCCGCTA

d

```
391 400 410 420 430 440 450 460 470 480 490 500 510 520
528F_1055R_complete
HQ912643.1
Consensus
ATCCARGGAGGGCAGCAGGGCGGTAAATACCCAACTCCGACACAGGGAGGTAGTGACAAATAAATACAAATGTCGGGCCCTTATTGGCTGGCAATGGAAATGAGAACAAATTAATCCCTATCCAGTA
.....
528F_1055R_complete
HQ912643.1
Consensus
TCCATTGGAGGGCAAGTCTGGTCCAGCAGC(GCGGTAATCCAGCTCCAA)TAGCGTATATTAAGTTGTTGCAGTTAAAAGCTCGTAGTTGAARATTTGATTTAGCGGTCAGTCCACACAGTGAG
.....
528F_1055R_complete
HQ912643.1
Consensus
TGCATGATGTGCTGGTCATGTTTCGTTGGACGCTGTGGCATTGAGTTGTCGTCATGGGAGACGATCGTTTACGTGAAAARATAGAGTGTCCAAAGCAGGCTTATGCCGTTGAAATATAGC
.....
528F_1055R_complete
HQ912643.1
Consensus
ATGGAAATAATAGATAGGACCAGGTAATTTTGTGGTTGTCACCTTGGTAATGATTAATAGGACAGTTGGGATATTCGATTGCGGTGTCAGAGTGAAATCTTGGATTTCCGACAGCAG
.....
528F_1055R_complete
HQ912643.1
Consensus
CTACTCGAAGCATTATCAGGATGTTTTTCATTAATCAGAGCAGAGTTAGGGGATCGAGATGATTAGATACCATCGTAGCTTAAACATAAATATGCCACAGGGATTTGCCAGGGTGTGTTA
.....
528F_1055R_complete
HQ912643.1
Consensus
TGCCCTGTGACACCTTAGGAGAAATCATAAGTTTTGGGTTCCGGGGGAGTATGGTCGACAGGCTCAAACTAAGACATTGACGGAGGGACACCAGGAGTGGAGCCTGCGGCTAATTTGACT
.....
528F_1055R_complete
HQ912643.1
Consensus
CACCACGGAAACTTACCAGGTCAGACATAGTGAGGATTGACAGATTGAGATTTTCTTGATTCATGGGTGGTGGTGCATGGCCGTCTTAGTTGGTGGAGTGATTTGCTGGTAAATCCGTTA
.....
528F_1055R_complete
HQ912643.1
Consensus
ACGACAGACCCCGCCTGCTAATAGGTGGTCTAGTGATTTTCACTGGATACATCTTCTAGAGGGACGTGCGTCTATTAGCGCAGGAGATGGGGCAATACAGGCTGTGATGCCCTTAGAT
```

**Figure S3.** Images of sea urchin embryos under optical microscope. Normal (a) and malformed (b-c) plutei were reported (Zeiss Axiovert135TV microscope, 10×/0.30 magnification/numerical aperture). Scale bar: 50  $\mu\text{m}$ .

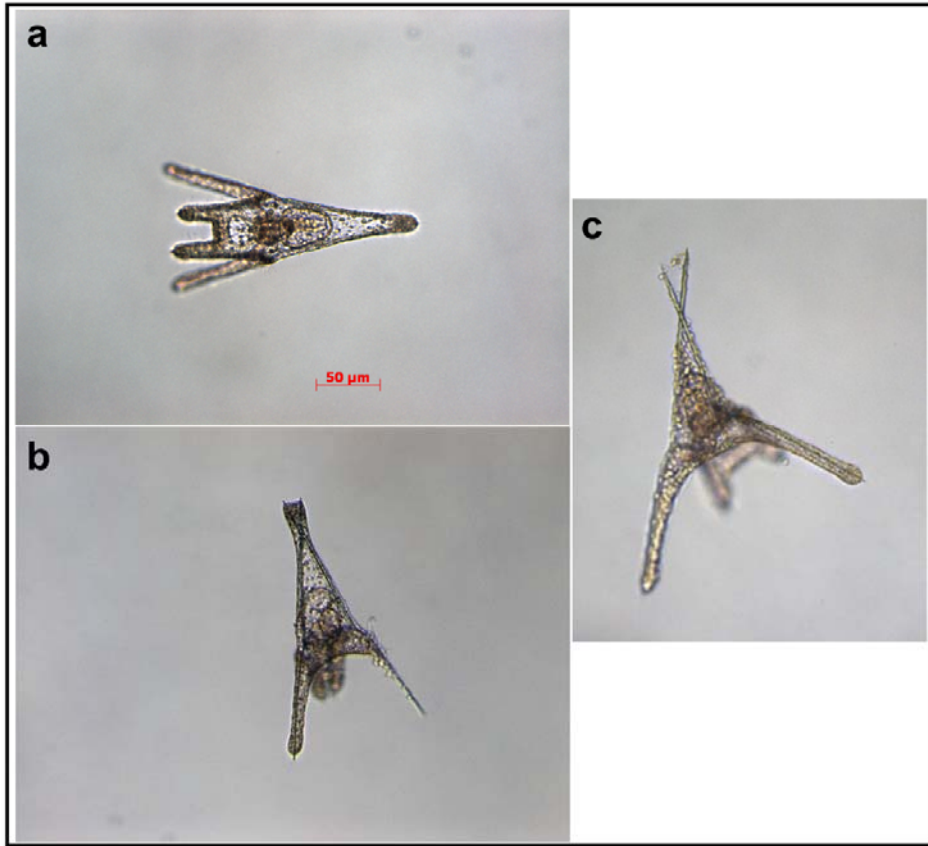

**Table S1.** Diameter in millimeters (mm) of alginate beads before and after dehydration.

|                        | <b>Diameter (mm)</b> |                 |
|------------------------|----------------------|-----------------|
|                        | Hydrated form        | Dehydrated form |
| Alginate beads         | $3.8 \pm 0.2$        | $1.3 \pm 0.1$   |
| Diatoms/alginate beads | $3.7 \pm 0.2$        | $1.2 \pm 0.1$   |

**Table S2.** Fold change values of sixty-two genes belonging to stress response, development and differentiation, skeletogenesis and detoxification processes analyzed by RT-qPCR. Up-regulated genes and down-regulated genes were highlighted in red and blue, respectively.

|                                         |                    | <i>N. shiloi</i> | <i>S. unipunctata</i> |
|-----------------------------------------|--------------------|------------------|-----------------------|
| <b>Stress</b>                           | <i>ARF1</i>        | -2.1             | -3.6                  |
|                                         | <i>caspase 3/7</i> | -2.5             | -3.8                  |
|                                         | <i>CASP8</i>       | 0.6              | -4.5                  |
|                                         | <i>cytb</i>        | 1.9              | 2.3                   |
|                                         | <i>ERCC3</i>       | -0.4             | -3.9                  |
|                                         | <i>GRHPR</i>       | -1.1             | -1.7                  |
|                                         | <i>GS</i>          | 3.4              | 4.5                   |
|                                         | <i>HIF1A</i>       | -2.3             | -2.6                  |
|                                         | <i>hsp56</i>       | -2.9             | -2.4                  |
|                                         | <i>hsp60</i>       | 2.7              | 2.9                   |
|                                         | <i>hsp70</i>       | 3.5              | 4.9                   |
|                                         | <i>MTase</i>       | -3.7             | -2.8                  |
|                                         | <i>NF-kB</i>       | 2.6              | 3.7                   |
|                                         | <i>PARP</i>        | 2.3              | 2.3                   |
|                                         | <i>p38 MAPK</i>    | -0.5             | 2.2                   |
|                                         | <i>p53</i>         | -3.6             | -4.6                  |
|                                         | <i>SDH</i>         | -1.9             | -2.9                  |
| <i>14-3-3 ε</i>                         | 3.9                | 3.3              |                       |
| <b>Development/<br/>Differentiation</b> | <i>ADMP2</i>       | -0.5             | 3.2                   |
|                                         | <i>Alix</i>        | 0.6              | 0.5                   |
|                                         | <i>Blimp</i>       | 1.5              | -0.6                  |
|                                         | <i>BP10</i>        | 0.3              | 0.5                   |
|                                         | <i>BRA</i>         | 2.6              | 3.5                   |
|                                         | <i>DELTA</i>       | 3.3              | 4.1                   |
|                                         | <i>δ-2-catenin</i> | -3.1             | -3.3                  |
|                                         | <i>FOXA</i>        | -3.5             | 7.7                   |
|                                         | <i>FoxG</i>        | 3.1              | 2.0                   |
|                                         | <i>Foxo</i>        | 3.1              | 3.9                   |
|                                         | <i>GFI1</i>        | -2.7             | -3.4                  |
|                                         | <i>GOOS</i>        | -6.9             | -5.4                  |
|                                         | <i>hat</i>         | -0.4             | -0.7                  |



|                              |               |      |      |
|------------------------------|---------------|------|------|
|                              | <i>H3.3</i>   | -2.2 | -4.8 |
|                              | <i>JNK</i>    | 0.3  | -4.9 |
|                              | <i>KIF19</i>  | -1.7 | -4.4 |
|                              | <i>nodal</i>  | 2.2  | -1.5 |
|                              | <i>NOTCH</i>  | 1.6  | -0.2 |
|                              | <i>OneCut</i> | 3.9  | -6.4 |
|                              | <i>SMAD6</i>  | 0.9  | 0.8  |
|                              | <i>sox9</i>   | 0.1  | 2.1  |
|                              | <i>TAK1</i>   | -4.6 | 9.7  |
|                              | <i>tcf4</i>   | 0.7  | 0.1  |
|                              | <i>TCF7</i>   | -4.1 | -5.9 |
|                              | <i>VEGF</i>   | -2.2 | 1.8  |
|                              | <i>Wnt5</i>   | 0.4  | 2.3  |
|                              | <i>Wnt6</i>   | 1.7  | 2.5  |
|                              | <i>Wnt8</i>   | 0.4  | 3.4  |
| <b><i>Skeletogenesis</i></b> | <i>BMP5-7</i> | -2.7 | -4.9 |
|                              | <i>C-jun</i>  | 1.9  | -3.4 |
|                              | <i>Nec</i>    | 2.3  | 3.7  |
|                              | <i>p16</i>    | 1.2  | 2.2  |
|                              | <i>p19</i>    | 3.7  | 4.8  |
|                              | <i>SM30</i>   | -3.4 | -5.4 |
|                              | <i>SM50</i>   | 0.3  | -2.5 |
|                              | <i>uni</i>    | -2.5 | -4.7 |
| <b><i>Detoxification</i></b> | <i>CAT</i>    | 3.8  | 4.1  |
|                              | <i>MDR1</i>   | 2.7  | 4.1  |
|                              | <i>MT</i>     | 2.4  | 0.2  |
|                              | <i>MT4</i>    | 3.7  | 1.2  |
|                              | <i>MT5</i>    | 4.7  | 3.4  |
|                              | <i>MT6</i>    | 2.8  | 1.0  |
|                              | <i>MT7</i>    | 2.6  | 0.2  |
|                              | <i>MT8</i>    | -2.2 | 2.5  |
